# Supplementary material for: Preparation of a novel curcumin nanoemulsion by ultrasonication and its comparative effects in wound healing and the treatment of inflammation
Source: PubMed Central journal article supplement — RSC Adv. 2019 Jun 28;9(35):20192–206. doi: 10.1039/c9ra03102b (PMC9065541; doi:10.1039/c9ra03102b), 2019-06-28
Supplement: RA-009-C9RA03102B-s001.pdf [file RA-009-C9RA03102B-s001.pdf]

| <b>Table 1.</b> Nanoformulations suggested by “Design Expert” software at independent variables and their responses. |                       |                |                |                |                |                     |                |                |                     |                |                |
|----------------------------------------------------------------------------------------------------------------------|-----------------------|----------------|----------------|----------------|----------------|---------------------|----------------|----------------|---------------------|----------------|----------------|
| Formulation code                                                                                                     | Independent variables |                |                |                |                | Dependent variables |                |                |                     |                |                |
|                                                                                                                      | Coded factors         |                |                |                |                | Observed responses  |                |                | Predicted responses |                |                |
|                                                                                                                      | X <sub>1</sub>        | X <sub>2</sub> | X <sub>3</sub> | X <sub>4</sub> | X <sub>5</sub> | Y <sub>1</sub>      | Y <sub>2</sub> | Y <sub>3</sub> | Y <sub>1</sub>      | Y <sub>2</sub> | Y <sub>3</sub> |
| NanoE1                                                                                                               | 5                     | 10             | 5              | 40             | 40             | 141.29± 14.31       | 89.66± 3.64    | 0.449 ± 0.035  | 140.17              | 89.88          | 0.445          |
| NanoE2                                                                                                               | 10                    | 10             | 5              | 40             | 40             | 93.33 ± 14.49       | 86.81 ± 0.61   | 0.467 ± 0.033  | 93.92               | 86.69          | 0.469          |
| NanoE3                                                                                                               | 5                     | 20             | 5              | 40             | 40             | 166.33 ± 16.38      | 89.87 ± 0.59   | 0.436 ± 0.034  | 166.85              | 89.75          | 0.438          |
| NanoE4                                                                                                               | 10                    | 20             | 5              | 40             | 40             | 53.02 ± 15.26       | 88.37 ± 0.58   | 0.464 ± 0.036  | 53.47               | 88.28          | 0.466          |
| NanoE5                                                                                                               | 5                     | 10             | 10             | 40             | 50             | 93.64 ± 6.48        | 98.64 ± 0.37   | 0.263 ± 0.021  | 95.86               | 99.01          | 0.276          |
| NanoE6                                                                                                               | 10                    | 10             | 15             | 40             | 40             | 186.38 ± 9.97       | 80.82 ± 0.76   | 0.367 ± 0.029  | 186.70              | 80.75          | 0.368          |
| NanoE7                                                                                                               | 5                     | 20             | 15             | 40             | 40             | 115.59 ± 8.21       | 91.94 ± 0.63   | 0.358 ± 0.029  | 115.91              | 91.87          | 0.359          |
| NanoE8                                                                                                               | 10                    | 20             | 15             | 40             | 40             | 144.96 ± 9.67       | 87.48 ± 0.49   | 0.341 ± 0.038  | 145.34              | 87.40          | 0.342          |
| NanoE9                                                                                                               | 5                     | 10             | 5              | 80             | 40             | 136.83              | 90.18          | 0.292          | 137.42              | 90.06          | 0.294          |
| NanoE10                                                                                                              | 10                    | 10             | 5              | 80             | 40             | 112.43              | 94.87          | 0.359          | 112.88              | 94.78          | 0.361          |
| NanoE11                                                                                                              | 5                     | 20             | 5              | 80             | 40             | 180.62              | 88.48          | 0.391          | 181.07              | 88.39          | 0.393          |
| NanoE12                                                                                                              | 10                    | 20             | 5              | 80             | 40             | 90.94               | 94.52          | 0.467          | 89.40               | 94.83          | 0.462          |
| NanoE13                                                                                                              | 5                     | 10             | 15             | 80             | 40             | 50.85               | 83.30          | 0.342          | 51.17               | 83.23          | 0.344          |
| NanoE14                                                                                                              | 10                    | 10             | 15             | 80             | 40             | 169.06              | 85.02          | 0.364          | 169.44              | 84.94          | 0.366          |

|         |    |    |    |    |    |        |       |       |        |       |       |
|---------|----|----|----|----|----|--------|-------|-------|--------|-------|-------|
| NanoE15 | 5  | 20 | 15 | 80 | 40 | 93.53  | 86.69 | 0.419 | 93.91  | 86.61 | 0.420 |
| NanoE16 | 10 | 20 | 15 | 80 | 40 | 146.46 | 89.77 | 0.450 | 145.04 | 90.05 | 0.446 |
| NanoE17 | 5  | 10 | 5  | 40 | 60 | 134.27 | 95.90 | 0.382 | 130.33 | 96.69 | 0.369 |
| NanoE18 | 10 | 10 | 5  | 40 | 60 | 92.63  | 90.91 | 0.375 | 91.86  | 91.06 | 0.372 |
| NanoE19 | 5  | 20 | 5  | 40 | 60 | 165.56 | 90.59 | 0.442 | 164.79 | 90.75 | 0.440 |
| NanoE20 | 10 | 20 | 5  | 40 | 60 | 58.63  | 86.95 | 0.445 | 59.17  | 86.84 | 0.447 |
| NanoE21 | 5  | 10 | 15 | 40 | 60 | 87.63  | 97.97 | 0.282 | 83.42  | 98.82 | 0.267 |
| NanoE22 | 10 | 10 | 15 | 40 | 60 | 188.60 | 90.01 | 0.230 | 187.75 | 90.18 | 0.227 |
| NanoE23 | 5  | 20 | 15 | 40 | 60 | 117.80 | 97.76 | 0.320 | 116.96 | 97.93 | 0.317 |
| NanoE24 | 10 | 20 | 15 | 40 | 60 | 153.49 | 91.16 | 0.277 | 154.16 | 91.02 | 0.279 |
| NanoE25 | 5  | 10 | 5  | 80 | 60 | 136.13 | 91.01 | 0.337 | 135.36 | 91.17 | 0.335 |
| NanoE26 | 10 | 10 | 5  | 80 | 60 | 118.04 | 93.56 | 0.378 | 118.59 | 93.45 | 0.380 |
| NanoE27 | 5  | 20 | 5  | 80 | 60 | 186.24 | 83.79 | 0.509 | 186.78 | 83.68 | 0.511 |
| NanoE28 | 10 | 20 | 5  | 80 | 60 | 102.87 | 87.69 | 0.559 | 102.87 | 87.68 | 0.559 |
| NanoE29 | 5  | 10 | 15 | 80 | 60 | 53.06  | 89.22 | 0.343 | 52.22  | 89.39 | 0.340 |
| NanoE30 | 10 | 10 | 15 | 80 | 60 | 177.59 | 88.80 | 0.339 | 178.26 | 88.67 | 0.341 |
| NanoE31 | 5  | 20 | 15 | 80 | 60 | 102.06 | 87.10 | 0.492 | 102.73 | 86.96 | 0.495 |

|                      |          |          |          |          |          |                |              |               |        |       |       |
|----------------------|----------|----------|----------|----------|----------|----------------|--------------|---------------|--------|-------|-------|
| NanoE32              | 10       | 20       | 15       | 80       | 60       | 161.30         | 88.03        | 0.498         | 161.63 | 87.96 | 0.499 |
| <b>Axial Points</b>  |          |          |          |          |          |                |              |               |        |       |       |
| NanoE33              | 1.553964 | 15       | 10       | 60       | 60       | 118.59 ± 5.47  | 92.25 ± 0.69 | 0.519 ± 0.026 | 117.46 | 92.51 | 0.515 |
| NanoE34              | 13.44604 | 15       | 10       | 60       | 60       | 132.00 ± 8.35  | 89.97 ± 0.78 | 0.548 ± 0.027 | 132.52 | 89.91 | 0.549 |
| NanoE35              | 7.5      | 3.107929 | 10       | 60       | 50       | 120.12 ± 15.42 | 92.89 ± 0.51 | 0.187 ± 0.039 | 119.01 | 93.16 | 0.183 |
| NanoE36              | 7.5      | 26.89207 | 10       | 60       | 50       | 130.45 ± 21.65 | 92.22 ± 0.46 | 0.361 ± 0.046 | 130.97 | 92.16 | 0.362 |
| NanoE37              | 7.5      | 15       | 1.89207  | 60       | 50       | 120.01 ± 19.18 | 93.99 ± 0.43 | 0.542 ± 0.058 | 119.80 | 93.84 | 0.455 |
| NanoE38              | 7.5      | 15       | 21.89207 | 60       | 50       | 130.56 ± 8.56  | 90.80 ± 0.54 | 0.313 ± 0.030 | 130.18 | 90.68 | 0.315 |
| NanoE39              | 7.5      | 15       | 10       | 12.43172 | 50       | 123.29         | 93.60        | 0.256         | 122.18 | 93.87 | 0.251 |
| NanoE40              | 7.5      | 15       | 10       | 107.5683 | 50       | 127.28         | 90.51        | 0.332         | 127.80 | 90.45 | 0.334 |
| NanoE41              | 7.5      | 15       | 10       | 60       | 26.21586 | 120.63         | 81.76        | 0.529         | 120.97 | 81.73 | 0.529 |
| NanoE42              | 7.5      | 15       | 10       | 60       | 73.78414 | 129.94         | 87.12        | 0.506         | 129.01 | 87.35 | 0.502 |
| <b>Centre Points</b> |          |          |          |          |          |                |              |               |        |       |       |
| NanoE43              | 7.5      | 15       | 10       | 60       | 50       | 129.64 ± 8.98  | 82.02 ± 0.68 | 0.335 ± 0.027 | 124.99 | 82.11 | 0.333 |
| NanoE44              | 7.5      | 15       | 10       | 60       | 50       | 129.64 ± 8.98  | 82.02 ± 0.68 | 0.335 ± 0.027 | 124.99 | 82.11 | 0.333 |
| NanoE45              | 7.5      | 15       | 10       | 60       | 50       | 129.64 ± 8.98  | 82.02 ± 0.68 | 0.335 ± 0.027 | 124.99 | 82.11 | 0.333 |
| NanoE46              | 7.5      | 15       | 10       | 60       | 50       | 129.64 ± 8.98  | 82.02 ± 0.68 | 0.335 ± 0.027 | 124.99 | 82.11 | 0.333 |
| NanoE47              | 7.5      | 15       | 10       | 60       | 50       | 129.64 ± 8.98  | 82.02 ± 0.68 | 0.335 ± 0.027 | 124.99 | 82.11 | 0.333 |

|         |     |    |    |    |    |                   |                  |                   |        |       |       |
|---------|-----|----|----|----|----|-------------------|------------------|-------------------|--------|-------|-------|
| NanoE48 | 7.5 | 15 | 10 | 60 | 50 | $129.64 \pm 8.98$ | $82.02 \pm 0.68$ | $0.335 \pm 0.027$ | 124.99 | 82.11 | 0.333 |
| NanoE49 | 7.5 | 15 | 10 | 60 | 50 | $129.64 \pm 8.98$ | $82.02 \pm 0.68$ | $0.335 \pm 0.027$ | 124.99 | 82.11 | 0.333 |
| NanoE50 | 7.5 | 15 | 10 | 60 | 50 | $129.64 \pm 8.98$ | $82.02 \pm 0.68$ | $0.335 \pm 0.027$ | 124.99 | 82.11 | 0.333 |
